# Supplementary material for: Comparison of pediatric and adult lymphomas involving the mediastinum characterized by distinctive clinicopathological and radiological features
Source: PubMed Central journal article supplement (PMC5451435; doi:10.1038/s41598-017-02720-1), 2017-05-31
Supplement: 41598_2017_2720_MOESM1_ESM.pdf [file 41598_2017_2720_MOESM1_ESM.pdf]

**Comparison of pediatric and adult lymphomas involving the mediastinum characterized by distinctive clinicopathological and radiological features**

Lei Chen<sup>1</sup>, Mingsong Wang<sup>2</sup>, Hua Fan<sup>3</sup>, Fengqing Hu<sup>2</sup>, Tingting Liu<sup>4</sup>

<sup>1</sup>Department of Pathology, Xinhua Hospital, Shanghai Jiaotong University School of Medicine, Shanghai, China;

<sup>2</sup>Department of Thoracic Cardiovascular Surgery, Xinhua Hospital, Shanghai Jiaotong University School of Medicine, Shanghai, China;

<sup>3</sup>Department of Radiology, Xinhua Hospital, Shanghai Jiaotong University School of Medicine, Shanghai, China;

<sup>4</sup>Department of Pediatric Hematology/Oncology, Xinhua Hospital, Shanghai Jiaotong University School of Medicine, Shanghai, China

**Correspondence:**

Tingting Liu, Department of Pediatric Hematology/Oncology, Xinhua Hospital, Shanghai Jiaotong University School of Medicine, Kongjiang Road 1665, Shanghai, 200092, China.

E-mail: liuting0552390@yahoo.co.jp

Short title: Lymphomas involving the mediastinum

**Supplementary Table 1. Immunohistochemical features of 31 cases with T-LBL**

| *Case no. | CD3 | CD2 | CD5 | CD7 | CD4 | CD8 | CD43 | TDT   | CD1a | CD34  | CD99 | CD117 | LCA | CD10 | Ki-67 | BCL2 |
|-----------|-----|-----|-----|-----|-----|-----|------|-------|------|-------|------|-------|-----|------|-------|------|
| 1         | +   | +   | +   | +   | +   | -   | +    | -     | +    | -     | N    | -     | +   | +    | 90%+  | -    |
| 2         | +   | -   | +   | +   | +   | -   | N    | N     | -    | -     | N    | N     | N   |      | N     | N    |
| 3         | +   | N   | +   | +   | N   | N   | N    | N     | -    | -     | +    | -     | -   | N    | 90%+  | N    |
| 4         | +   | +   | -   | +   | +   | -   | +    | +     | +    | -     | +    | -     | F+  | +    | 95%+  | +    |
| 5         | +   | N   | +   | +   | +   | +   | +    | F+    | +    | -     | +    | -     | N   | -    | 90%+  | -    |
| 6         | +   | +   | +   | +   | F+  | +   | +    | F+    | +    | -     | +    | -     | +   | F+   | 60%+  | +    |
| 7         | +   | N   | N   | +   | N   | N   | N    | +     | N    | +     | +    | N     | +   | +    | 90%+  | N    |
| 8         | +   | +   | +   | +   | -   | -   | N    | N     | -    | -     | N    | N     | N   | N    | N     | N    |
| 9         | +   | N   | +   | +   | N   | N   | N    | +     | +    | -     | -    | N     | +   | N    | 75%+  | N    |
| 10        | +   | N   | N   | N   | N   | N   | +    | F+    | N    | -     | N    | N     | N   | -    | 90%+  | -    |
| 11        | +   | +   | +   | +   | N   | N   | N    | N     | +    | +     | N    | N     | N   | N    | N     | N    |
| 12        | +   | +   | N   | N   | N   | N   | N    | +     | N    | -     | N    | N     | N   | +    | 90%+  | +    |
| 13        | +   | +   | +   | +   | +   | -   |      | +     | N    | +     | N    | -     |     | -    |       |      |
| 14        | +   | N   | -   | +   | +   | +   | +    | +     | +    | -     | +    | -     | +   | +    | 90%+  | +    |
| 15        | +   | N   | +   | +   | +   | +   | +    | +     | +    | -     | -    | -     | N   | +    | 70%+  | +    |
| 16        | +   | +   | +   | +   | -   | +   | -    | +     | +    | -     | +    | N     | +   | -    | 80%+  | N    |
| 17        | +   | -   | +   | +   | +   | -   | N    | +     | -    | -     | +    | -     | +   | +    | 70%+  | N    |
| 18        | -   | -   | N   | -   | -   | -   | +    | Part+ | -    | Part+ | -    | +     | +   | -    | 80%+  | N    |
| 19        | +   | +   | -   | +   | N   | N   | N    | +     | N    | -     | N    | N     | N   | +    | 90%+  | +    |
| 20        | -   | -   | -   | +   | -   | -   | +    | -     | -    | +     | -    | Part+ | +   | -    | 40%+  | +    |
| 21        | +   | N   | N   | N   | N   | N   | N    | +     | N    | N     | N    | N     | N   | +    | 90%+  | +    |
| 22        | +   | N   | -   | +   | N   | N   | N    | +     | +    | -     | +    | N     | N   | -    | -     | +    |
| 23        | +   | N   | +   | +   | +   | +   | +    | +     | +    | +     | +    | -     | N   | +    | 80%+  | F+   |

|           |   |   |   |   |   |   |   |   |   |   |   |   |   |   |             |   |
|-----------|---|---|---|---|---|---|---|---|---|---|---|---|---|---|-------------|---|
| <b>24</b> | + | N | N | - | N | N | N | - | + | - | + | N | + | + | <b>60%+</b> | - |
| <b>32</b> | + | N | - | + | N | N | + | + | N | N | N | N | - | + | <b>40%+</b> | N |
| <b>33</b> | + | - | N | + | N | N | + | + | N | - | + |   | - | - | <b>90%+</b> |   |
| <b>34</b> | + | + | + | + | N | N | N | N | - | N | N | N | N | N | N           | N |
| <b>35</b> | + | - | + | + | - | - | - | - | - | - | + | - | + | N | N           | N |
| <b>36</b> | + | + | + | + | - | - | + | - | + | - | - | - | + | + | <b>90%+</b> | + |
| <b>37</b> | + | + | - | + | - | + | + | + | N | - | N | N | N | - | <b>90%+</b> | + |
| <b>38</b> | + | N | - | N | N | N | N | + | N | N | + | N | + | - | <b>60%+</b> | N |

Abbreviations: F, focal; N, not done; +, positive; -, negative.

\*Case numbers are identical with the patient number used in Table 1.

**Supplementary Table 2. Immunohistochemical features of 21 cases with B-cell lymphomas**

| *Case no. | Histological subtype | CD20 | PAX5 | CD79a | CD43 | CD3 | CD7 | CD10 | BCL6 | MUM1 | Ki-67 | P53 | BCL2 | EMA | CD15 | CD30 | CD23 |
|-----------|----------------------|------|------|-------|------|-----|-----|------|------|------|-------|-----|------|-----|------|------|------|
| 25        | CHL                  | -    | +    | N     | N    | -   | -   | -    | N    | N    | N     | N   | N    | N   | -    | +    | N    |
| 26        | CHL                  | -    | +    | -     | N    | -   | -   | -    | N    | -    | 30%+  | N   | N    | N   | +    | +    | N    |
| 27        | CHL                  | F+   | +    | -     | N    | N   | +   | -    | F+   | N    | 60%+  | +   | -    | -   | -    | +    | N    |
| 28        | CHL                  | -    | F+   | -     | +    | +   | -   | -    | -    | +    | 40%+  | N   | -    | N   | -    | +    | +    |
| 29        | CHL                  | +    | -    | +     | N    | -   | -   | -    | -    | -    | 10%+  | N   | -    | -   | +    | +    | -    |
| 30        | CHL                  | F+   | +    | N     | N    | F+  | N   | N    | N    | +    | N     | N   | N    | N   | +    | +    | N    |
| 31        | CHL                  | -    | F+   | -     | -    | -   | -   | -    | -    | +    | 30%+  | -   | -    | -   | +    | +    | -    |
| 39        | CHL                  | -    | F+   | N     | N    | -   | N   | N    | N    | N    | 30%+  | N   | N    | N   | +    | +    | +    |
| 40        | CHL                  | -    | +    | -     | +    | +   | +   | -    | -    | +    | 10%+  | +   | -    | -   | +    | +    | +    |
| 41        | CHL                  | -    | -    | -     | +    | +   | N   | -    | -    | +    | 60%+  | -   | -    | -   | +    | +    | -    |
| 42        | CHL                  | -    | +    | -     | +    | +   | -   | -    | N    | N    | 30%+  | N   | -    | -   | +    | +    | +    |
| 43        | CHL                  | +    | +    | +     | N    | N   | N   | N    | N    | N    | 20%+  | N   | N    | N   | +    | +    | +    |
| 44        | PMBL                 | +    | +    | +     | -    | -   | -   | -    | -    | N    | 50%+  | N   | -    | +   | -    | F+   | -    |
| 45        | PMBL                 | +    | N    | N     | N    | N   | N   | -    | N    | N    | 60%+  | N   | N    | N   | N    | N    | +    |
| 46        | PMBL                 | +    | +    | +     | N    | -   | -   | -    | +    | +    | 30%+  | N   | +    | -   | -    | -    | +    |
| 47        | PMBL                 | +    | +    | +     | +    | F+  | F+  | -    | +    | +    | 40%+  | N   | +    | -   | -    | F+   | +    |
| 48        | PMBL                 | -    | +    | -     | N    | -   | N   | -    | -    | +    | 50%+  | -   | +    | -   | -    | +    | N    |
| 49        | PMBL                 | +    | +    | +     | -    | -   | -   | -    | +    | -    | 70%+  | N   | +    | -   | -    | -    | +    |
| 50        | MALT lymphoma        | +    | +    | +     | N    | -   | N   | -    | N    | F+   | 10%+  | -   | +    | -   | N    | N    | -    |
| 51        | DLBCL                | +    | N    | +     | N    | -   | N   | -    | +    | +    | 70%+  | N   | +    | N   | N    | -    | N    |
| 52        | DLBCL                | +    | +    | +     | N    | -   | -   | N    | N    | N    | 50%+  | N   | N    | N   | N    | N    | N    |

Abbreviations: F, focal; N, not done; +, positive; -, negative.

\*Case numbers are identical with the patient number used in Table 1.
